# Supplementary material for: Gate-tunable interfacial properties of in-plane ML MX2 1T′–2H heterojunctions
Source: Royal Society of Chemistry journal article supplement (doi:10.1039/c8tc01106k), 2018-01-01
Supplement: c8tc01106k1.pdf [file c8tc01106k1.pdf]

## Supporting information

### Gate-tunable interfacial properties of in-plane ML MX<sub>2</sub> 1T'-2H heterojunctions

Shiqi Liu,<sup>1, †</sup> Jingzhen Li,<sup>1, †</sup> Bowen Shi,<sup>1</sup> Xiuying Zhang,<sup>1</sup> Yuanyuan Pan,<sup>1</sup> Meng Ye,<sup>1</sup> Ruge Quhe,<sup>3</sup> Yangyang Wang,<sup>1,4</sup> Han Zhang,<sup>1</sup> Jiahuan Yan,<sup>1</sup> Linqiang Xu,<sup>1</sup> Ying Guo,<sup>5</sup> Feng Pan,<sup>6, \*</sup>  
and Jing Lu<sup>1, 2, \*</sup>

<sup>1</sup> State Key Laboratory for Mesoscopic Physics and Department of Physics, Peking University, Beijing 100871, P. R. China

<sup>2</sup> Collaborative Innovation Center of Quantum Matter, Beijing 100871, P. R. China

<sup>3</sup> State Key Laboratory of Information Photonics and Optical Communications and School of Science, Beijing University of Posts and Telecommunications, Beijing 100876, P. R. China

<sup>4</sup> Nanophotonics and Optoelectronics Research Center, Qian Xuesen Laboratory of Space Technology, China Academy of Space Technology, Beijing 100094, P. R. China

<sup>5</sup> School of Physics and Telecommunication Engineering, Shaanxi Sci-Tech University, Hanzhong 723001, P. R. China

<sup>6</sup> School of Advanced Materials, Peking University, Shenzhen Graduate School, Shenzhen 518055, P. R. China

Email: jinglu@pku.edu.cn, panfeng@pkusz.edu.cn

<sup>†</sup>These authors contributed equally to this work.

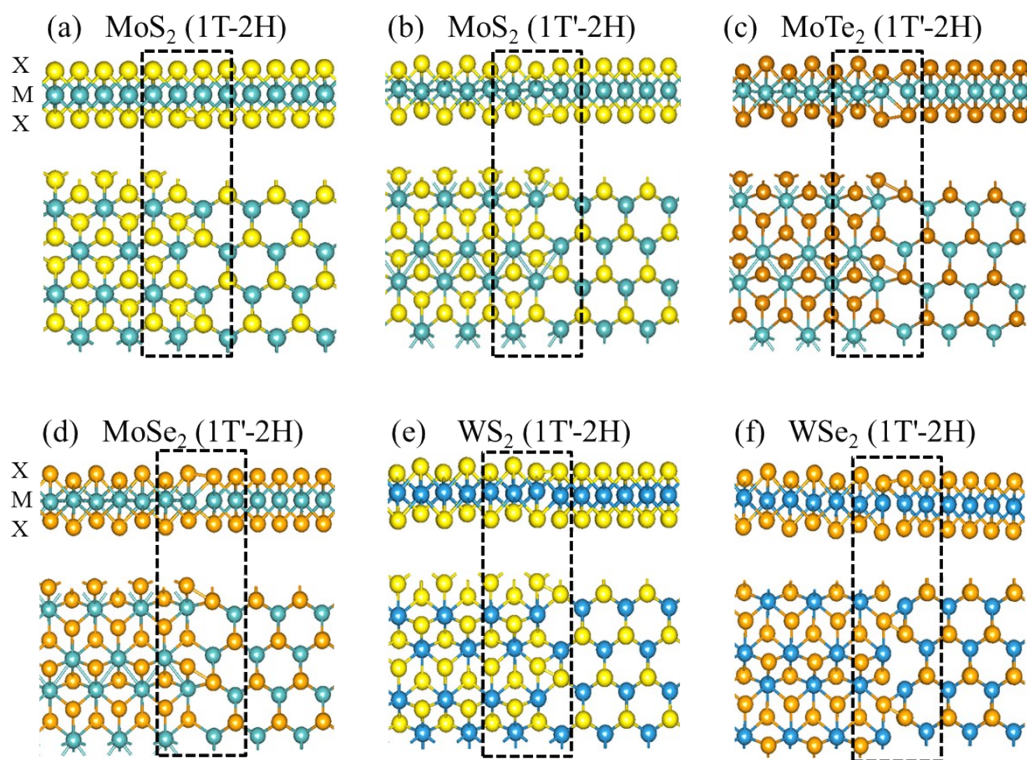

**Figure S1.** (a) ~ (f): Interfacial structures of the contact configuration for the ML  $\text{MoS}_2$  1T-2H in-plane and the ML  $\text{MX}_2$  1T'-2H in-plane heterojunctions before optimization. The 1T'/1T and 2H phase within one period at the interface are zoomed in the rectangle black dash line.

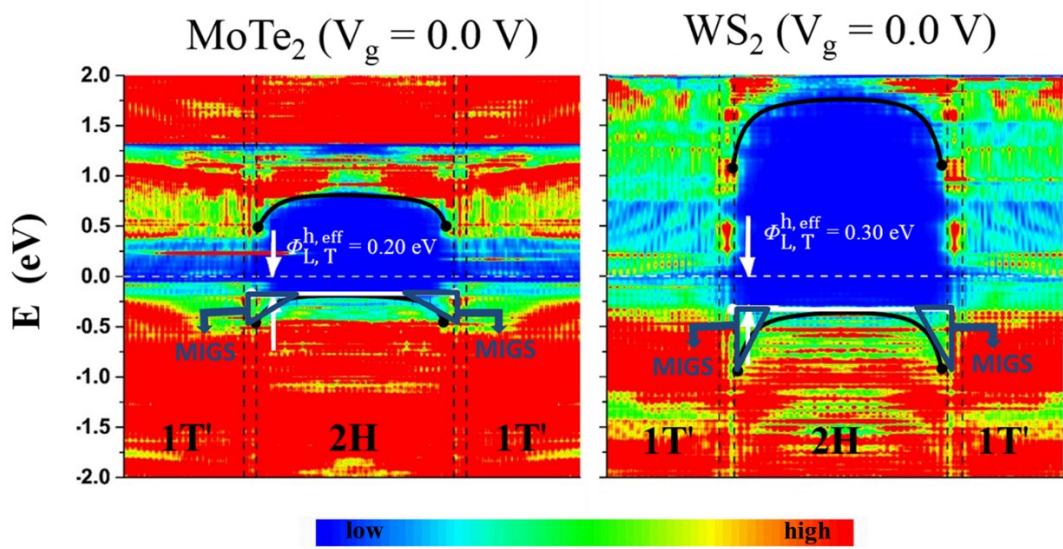

**Figure S2:** Energy- and space-dependent typical charge density of the MIGS in the ML MoTe<sub>2</sub> and WS<sub>2</sub> 1T'-2H in-plane heterojunctions. The MIGS at the interface are circled by the dark blue right triangle.

$\Phi_W^e$  (eV)

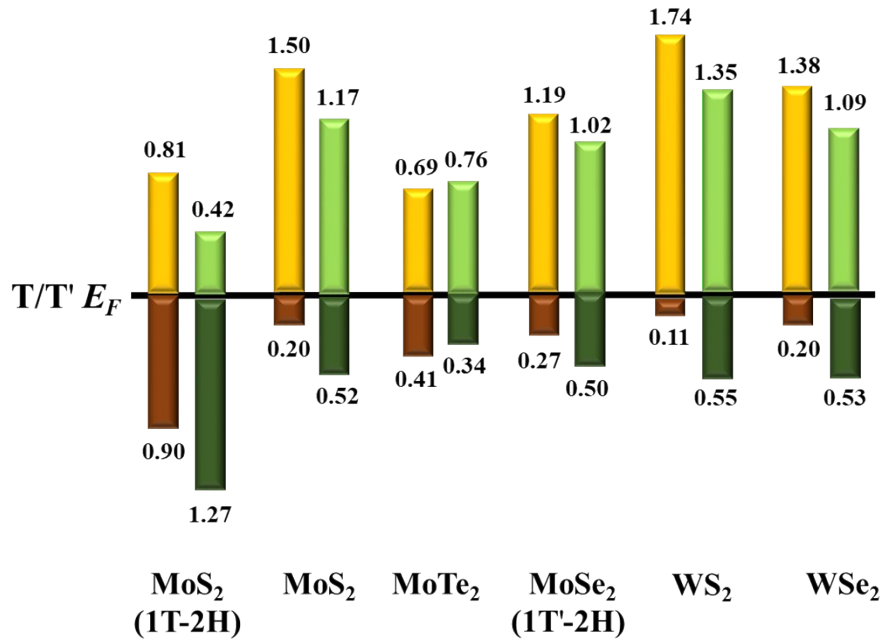

$\Phi_W^h$  (eV)

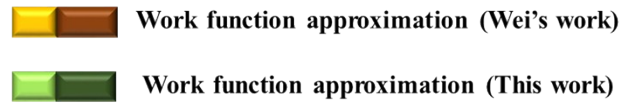

**Figure S3.** Comparison of the SBHs ( $\Phi_W^e/\Phi_W^h$ ) of the work function approximation between this work and Wei's work.<sup>1</sup>

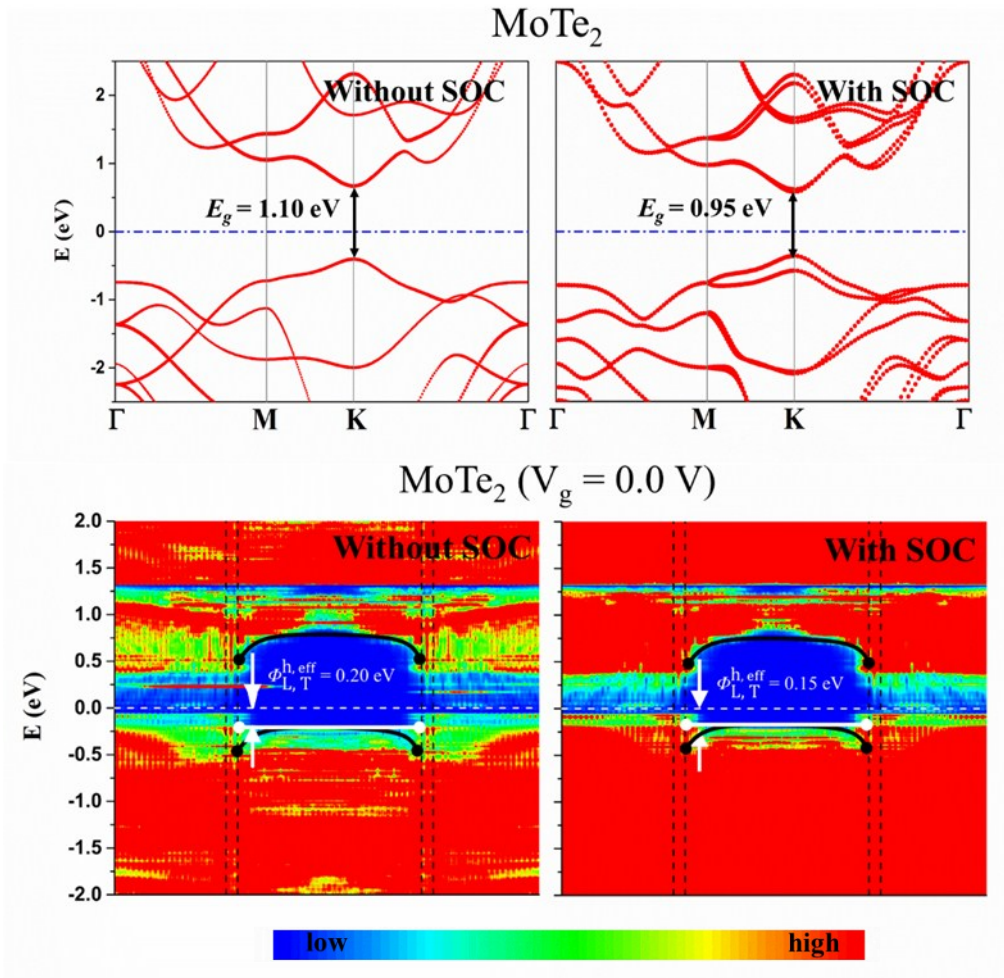

**Figure S4.** Comparison of the band structure and the transport SBH of the ML MoTe<sub>2</sub> 1T'-2H in-plane heterojunction without and with spin orbit coupling (SOC).

### Reference

- (1) Liu, Y. Y.; Stradins, P.; Wei, S. H. Van Der Waals Metal-Semiconductor Junction: Weak Fermi Level Pinning Enables Effective Tuning of Schottky Barrier. *Sci. Adv.* **2016**, *2* (4), e1600069.
